# Supplementary material
Source: PubMed Central journal article supplement (PMC2615098)

# Supplementary Figure 1

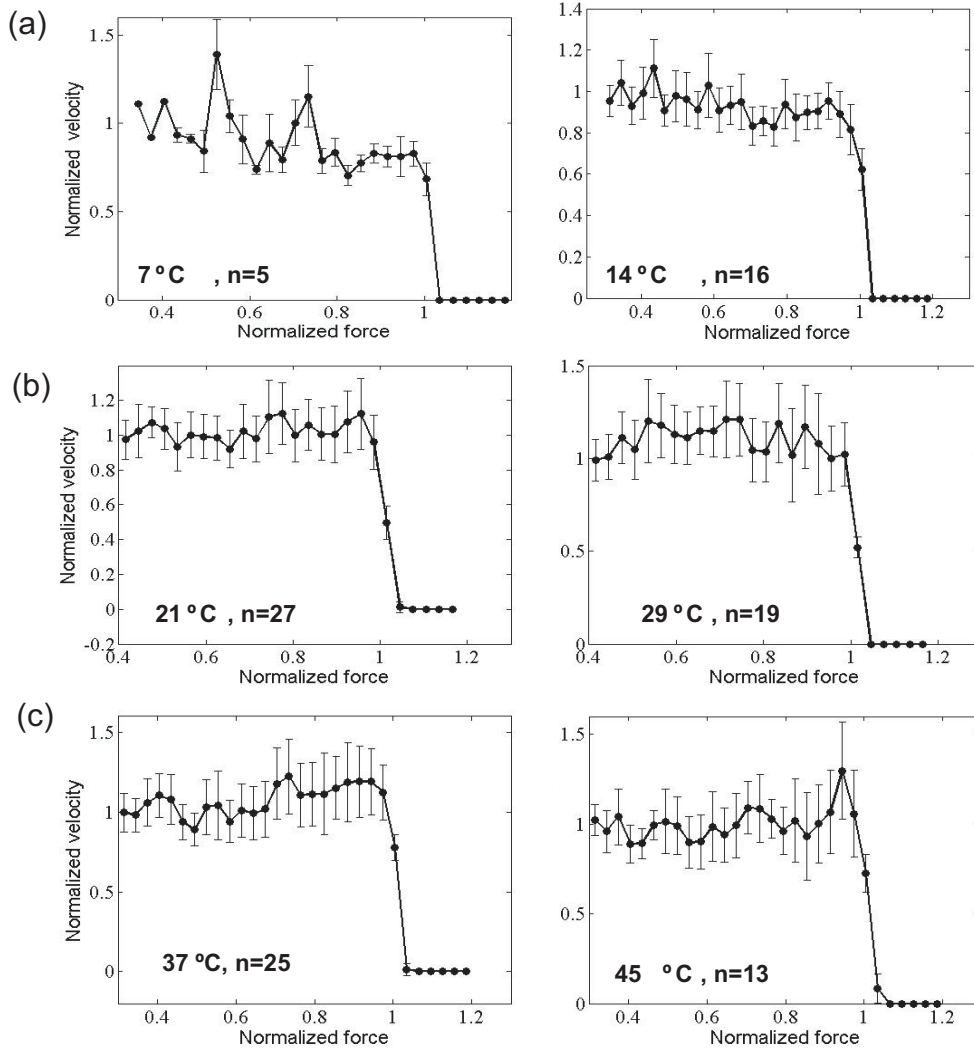

Supplement: NIHMS71443-supplement-01.pdf [file NIHMS71443-supplement-01.pdf]

Supplementary Figure 2

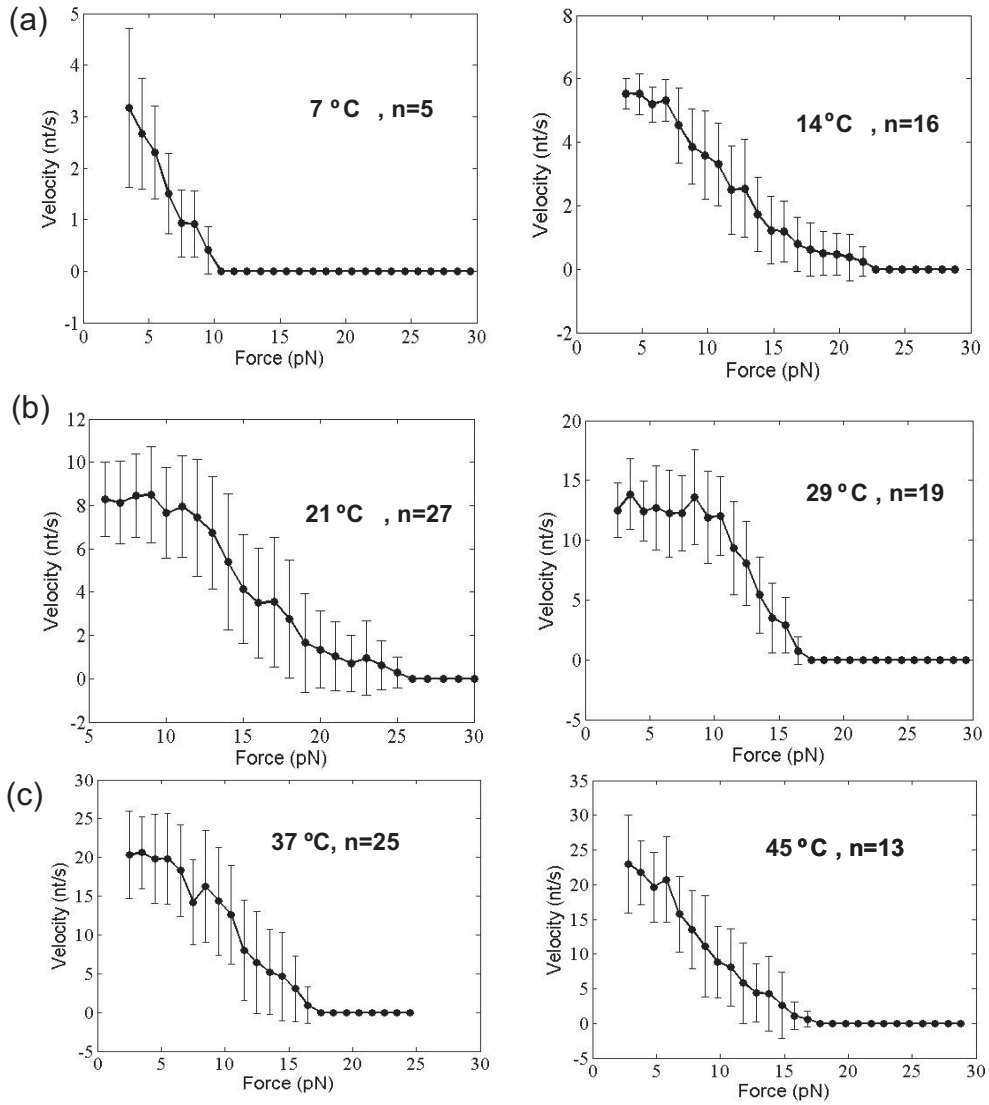

Supplement: NIHMS71443-supplement-02.pdf [file NIHMS71443-supplement-02.pdf]
